# Supplementary material for: Lymphocyte Circadian Clocks Control Lymph Node Trafficking and Adaptive Immune Responses
Source: PubMed Central journal article supplement — Immunity. 2017 Jan 17;46(1):120–32. doi: 10.1016/j.immuni.2016.12.011 (PMC5263259; doi:10.1016/j.immuni.2016.12.011), 2017-01-17
Supplement: mmc1.pdf [file mmc1.pdf]

**Immunity, Volume 46**

## **Supplemental Information**

### **Lymphocyte Circadian Clocks**

### **Control Lymph Node Trafficking**

### **and Adaptive Immune Responses**

**David Druzd, Olga Matveeva, Louise Ince, Ute Harrison, Wenyan He, Christoph Schmal, Hanspeter Herzel, Anthony H. Tsang, Naoto Kawakami, Alexei Leliavski, Olaf Uhl, Ling Yao, Leif Erik Sander, Chien-Sin Chen, Kerstin Kraus, Alba de Juan, Sophia Martina Hergenhan, Marc Ehlers, Berthold Koletzko, Rainer Haas, Werner Solbach, Henrik Oster, and Christoph Scheiermann**

SUPPLEMENTAL INFORMATION

Figure S1

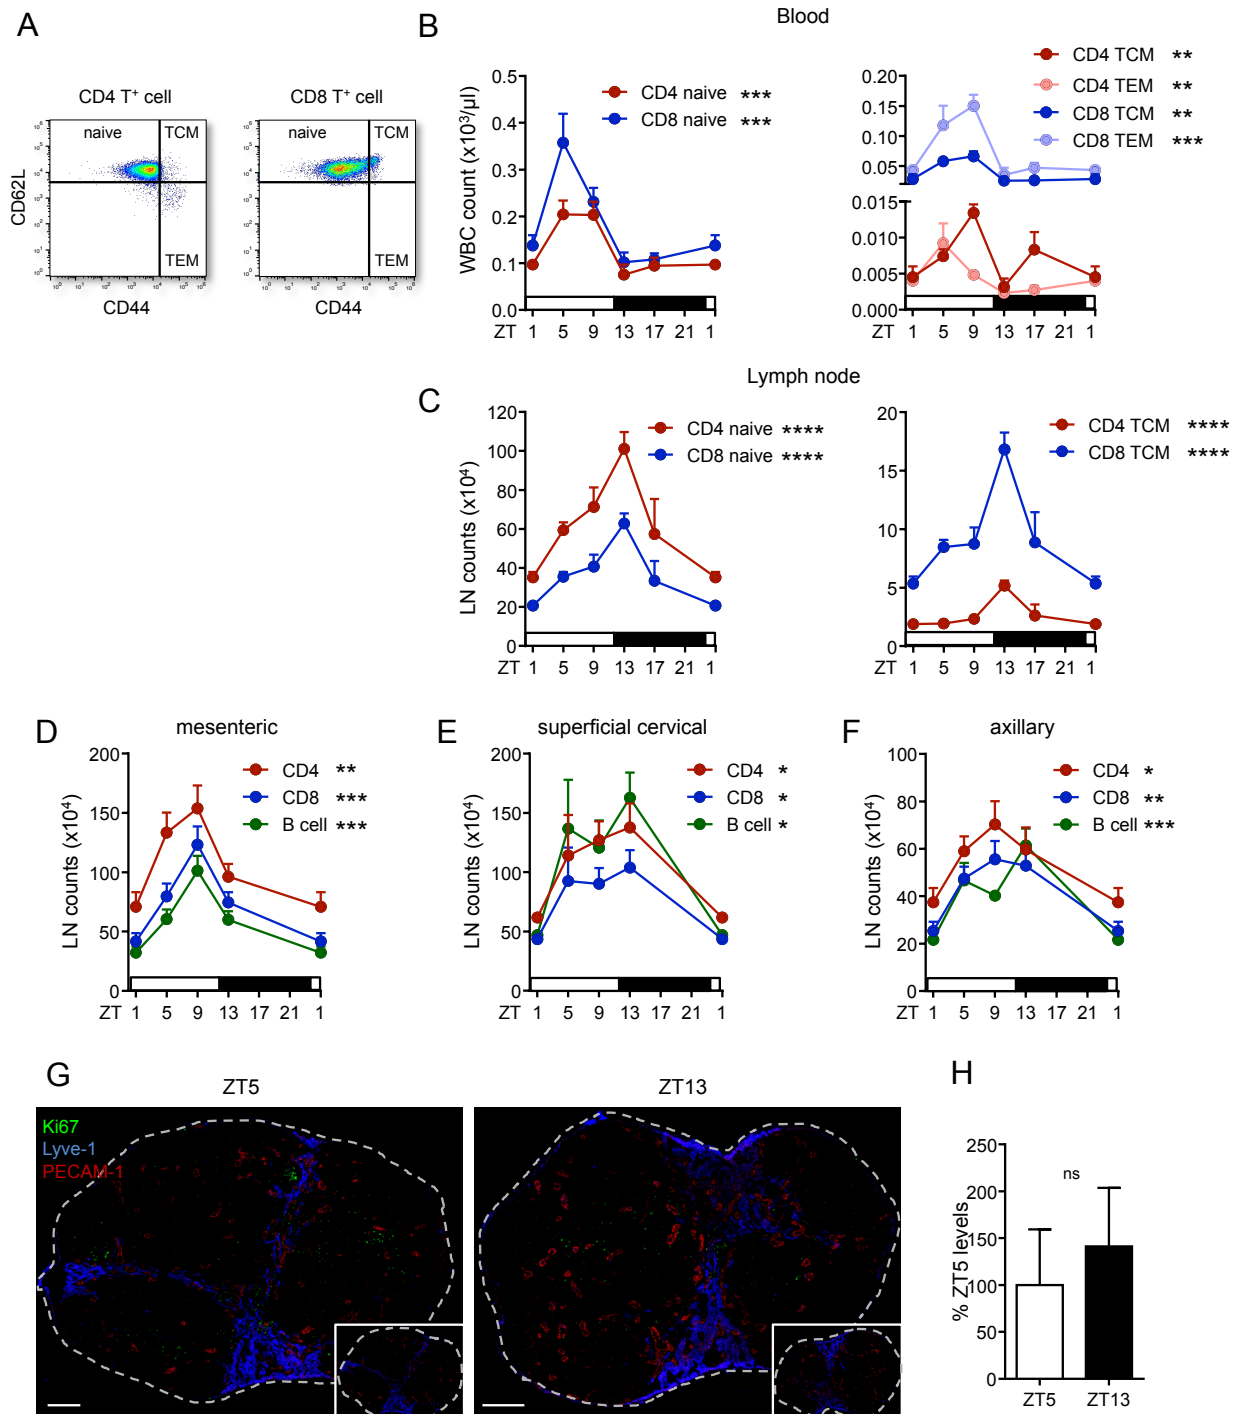

**Figure S1, related to Figure 1**

**Oscillatory T lymphocyte subpopulations in blood and lymph node**

(A-C) Gating strategy (gated on live cells) (A) and counts of naïve, central memory (TCM) and effector memory (TEM) CD4 and CD8 T lymphocytes in (B) blood (n=3-5 mice) and (C) lymph node (n= 6-18 mice); one-way ANOVA. (D-F) Counts of CD4 and CD8 T cells and B cells in (D) mesenteric lymph node (n=7-11 mice) (E) superficial cervical lymph node (n=4-7 mice) and (F) axillary lymph node (n=7 mice); one-way ANOVA. (G) Images of lymph node sections harvested at ZT5 and ZT13 and stained with antibodies directed against Ki67, PECAM-1, and Lyve-1. Inset: isotype antibody-stained control sections. Scale bars: 200  $\mu$ m. (H) Quantification of Ki67<sup>+</sup> cells per lymph node section; n=4-5 mice. \*p<0.05, \*\*p<0.01, \*\*\*p<0.001, \*\*\*\*p<0.0001.

Figure S2

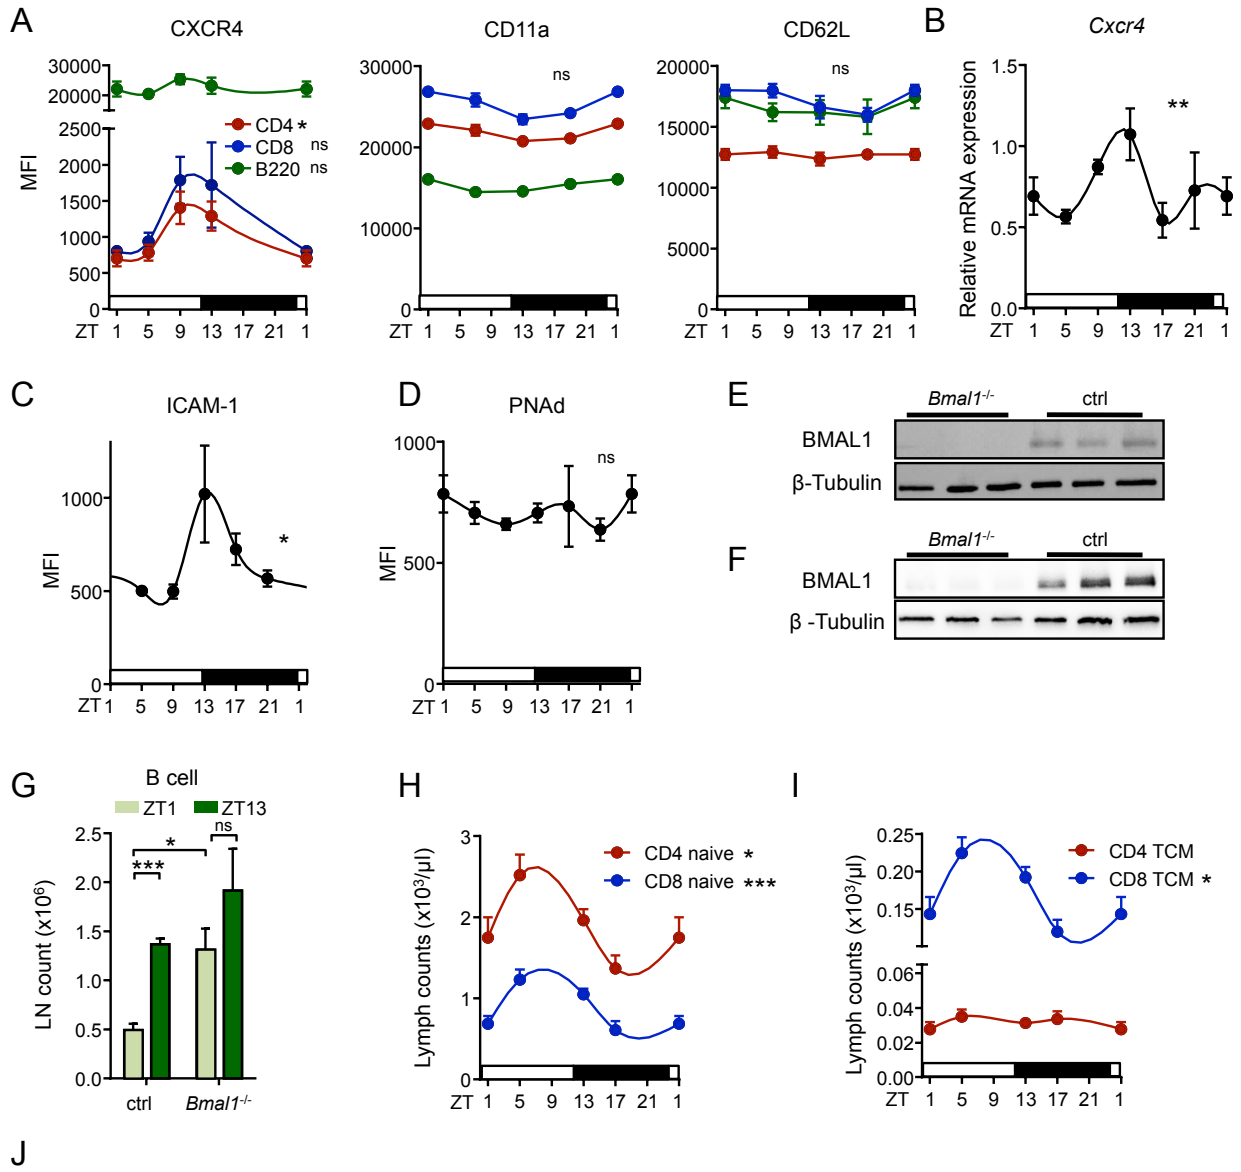

| Time                      | ZT1           | ZT7           | ZT13          | ZT21          |
|---------------------------|---------------|---------------|---------------|---------------|
| Lymph volume ( $\mu$ l)   | 72 $\pm$ 5    | 70 $\pm$ 5    | 68 $\pm$ 4    | 79 $\pm$ 4    |
| Lymph flow ( $\mu$ l/min) | 1.2 $\pm$ 0.1 | 1.2 $\pm$ 0.1 | 1.1 $\pm$ 0.1 | 1.3 $\pm$ 0.1 |

**Figure S2, related to Figures 2, 3 and 4**

**Oscillations of leukocyte promigratory factors and numbers**

(A) Oscillations in protein surface expression on lymphocyte subpopulations in lymph nodes; CXCR4, CD11a, CD62L; n=3-5 mice, one-way ANOVA; MFI, mean fluorescence intensity. (B) Q-PCR analysis of LN *Cxcr4* over 24h; n=3-5 mice, one-way ANOVA. (C-D) Quantification of expression of ICAM-1 (C) and PNA<sup>d</sup> (D) on HEV over 24h in constant darkness (CT, circadian time: the corresponding light and dark phase are indicated); n=3 mice, one-way ANOVA. (E) Amount of BMAL1 protein in isolated splenic T cells from T cell specific *Bmal1*<sup>-/-</sup> and control animals; n = 3 mice, each lane represents an individual animal. (F) Amount of BMAL1 protein in isolated splenic B cells from B cell specific *Bmal1*<sup>-/-</sup> and control animals, each lane represents a technical replicate. (G) Lymph node B cell counts in control and B-cell-specific *Bmal1*<sup>-/-</sup> mice; n=3-4 mice, unpaired student's t-test. (H-I) Counts of naïve and central memory (TCM) CD4 and CD8 T lymphocytes in lymph; n=5-17 mice, one-way ANOVA. (J) Harvested lymph volume and flow rate over 24h; n=7-22 mice. \*p<0.05, \*\*p<0.01, \*\*\*p<0.001.

Figure S3

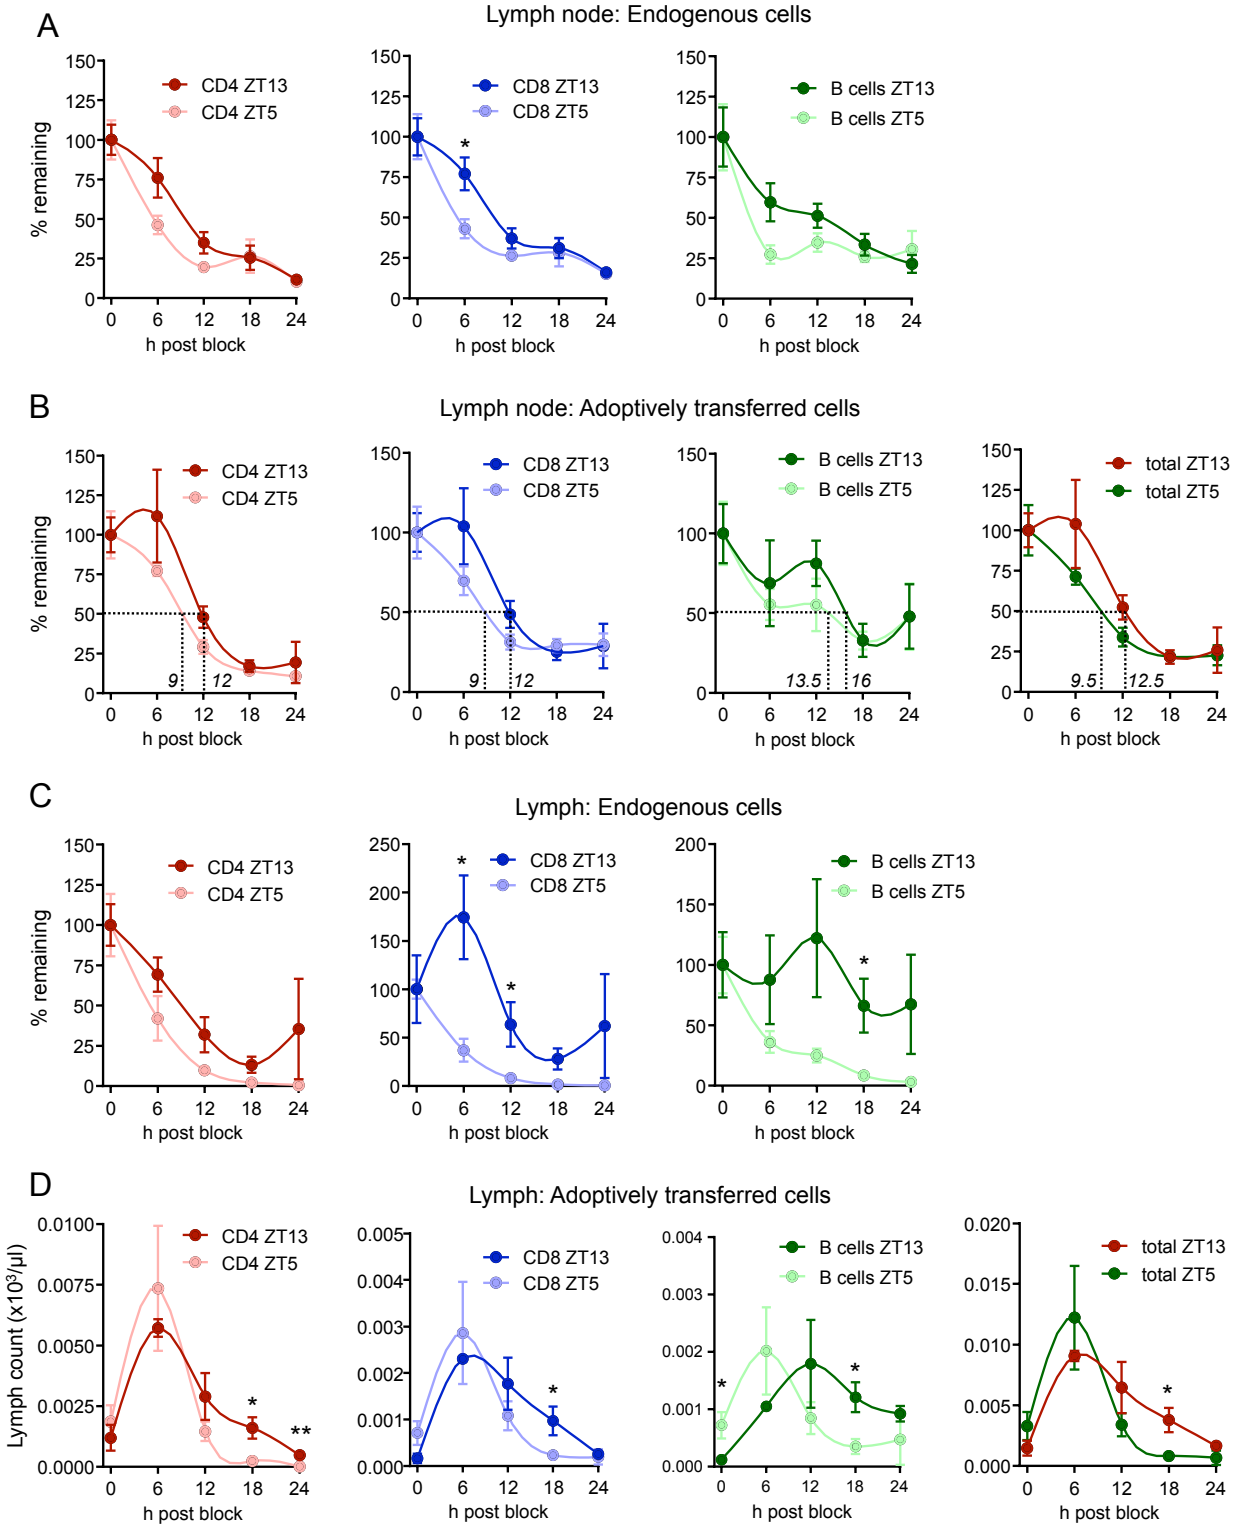

**Figure S3, related to Figure 4**

**Analysis of oscillations in lymph node half life**

Change in cellular numbers (in % (A-C)) or absolute numbers (D) of endogenous (A and C) and adoptively transferred (B and D) leukocytes in lymph node and lymph over 24h after block of leukocyte homing. Lymph node: n= 3-10 mice; lymph: n=3-6 mice, unpaired student's t-test. \*p<0.05, \*\*p<0.01.

## Figure S4

For the sake of simplicity, it was assumed that both homing and egress rhythms follow a sinusoidal oscillation with a certain amplitude and phase. The individual phases were termed  $\Phi_h$  and  $\Phi_e$ , respectively.

Let  $x(t)$  be the time-dependent lymphocyte count in the lymph node:

$$\frac{dx(t)}{dt} = g(t) - l(t) \quad (1)$$

Here, the time-dependent gain rate is represented by  $g(t)$  and can be summarised as a non-negative sinusoidal function of the form:

$$g(t) = A(1 + \sin(\omega t + \Phi_h)) \quad (2)$$

where  $A$  is amplitude and  $\omega$  is angular frequency. The time-dependent loss rate is represented by  $l(t)$  and can be replaced by a non-negative sinusoidal function of the form:

$$l(t) = d(1 + \sin(\omega t + \Phi_e)) x(t) \quad (3)$$

where  $d$  is decay rate and other nomenclature remains the same.

Using these formulae, a model for circadian homing with the egress replaced with a simple exponential decay rate can be summarised as:

$$\frac{dx(t)}{dt} = A(1 + \sin(\omega t + \Phi_h)) - dx(t) \quad (4)$$

A model for circadian egress with a fixed gain rate can be summarised as:

$$\frac{dx(t)}{dt} = A - d(1 + \sin(\omega t + \Phi_e)) x(t) \quad (5)$$

A model where both homing and egress oscillate can be summarised as:

$$\frac{dx(t)}{dt} = A(1 + \sin(\omega t + \Phi_h)) - d(1 + \sin(\omega t + \Phi_e)) x(t) \quad (6)$$

Model parameters were estimated by fitting to time series data obtained under steady state and blocked homing conditions. Time series data obtained under a blocked egression was spared from the fitting and taken as a cross-validation. Comparisons of modelled and actual data in steady state conditions are shown in Figure 4G (total cell count) and below (individual subsets).

The relative quality of the models given our set of data was tested by means of the Akaike information criterion (AIC), using the formula commonly used for regression models. Its value can be given by:

$$AIC = N \ln(X^2/N) + 2K \quad (7)$$

where  $N$  is the number of data points,  $K$  is the number of parameters plus one, and  $X^2$  is the residual sum of squares. Models with smaller numbers of AIC values are assumed to outperform those with higher values.

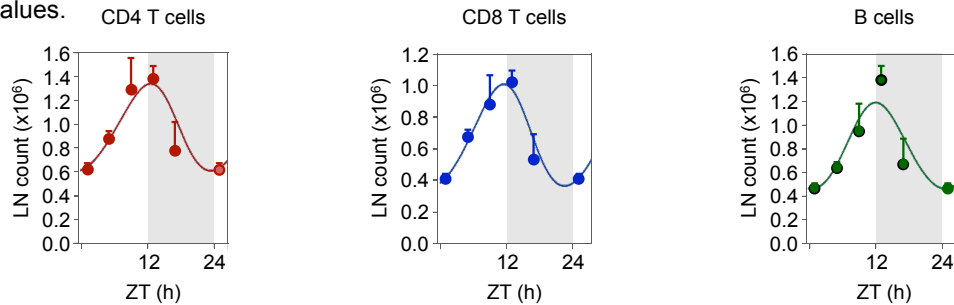



**Figure S4, related to Figure 4**

**Mathematical modeling of cellular oscillations in lymph nodes**

Formulas and fits for optimal modeling parameter sets (curves) vs. actual data sets (points) for steady-state oscillations of CD4 and CD8 T cells and B cells using the dual oscillation mathematical model that incorporates rhythmic homing to LNs and rhythmic egress from LNs. The ZT1 time point has been double-plotted to facilitate viewing.

Figure S5

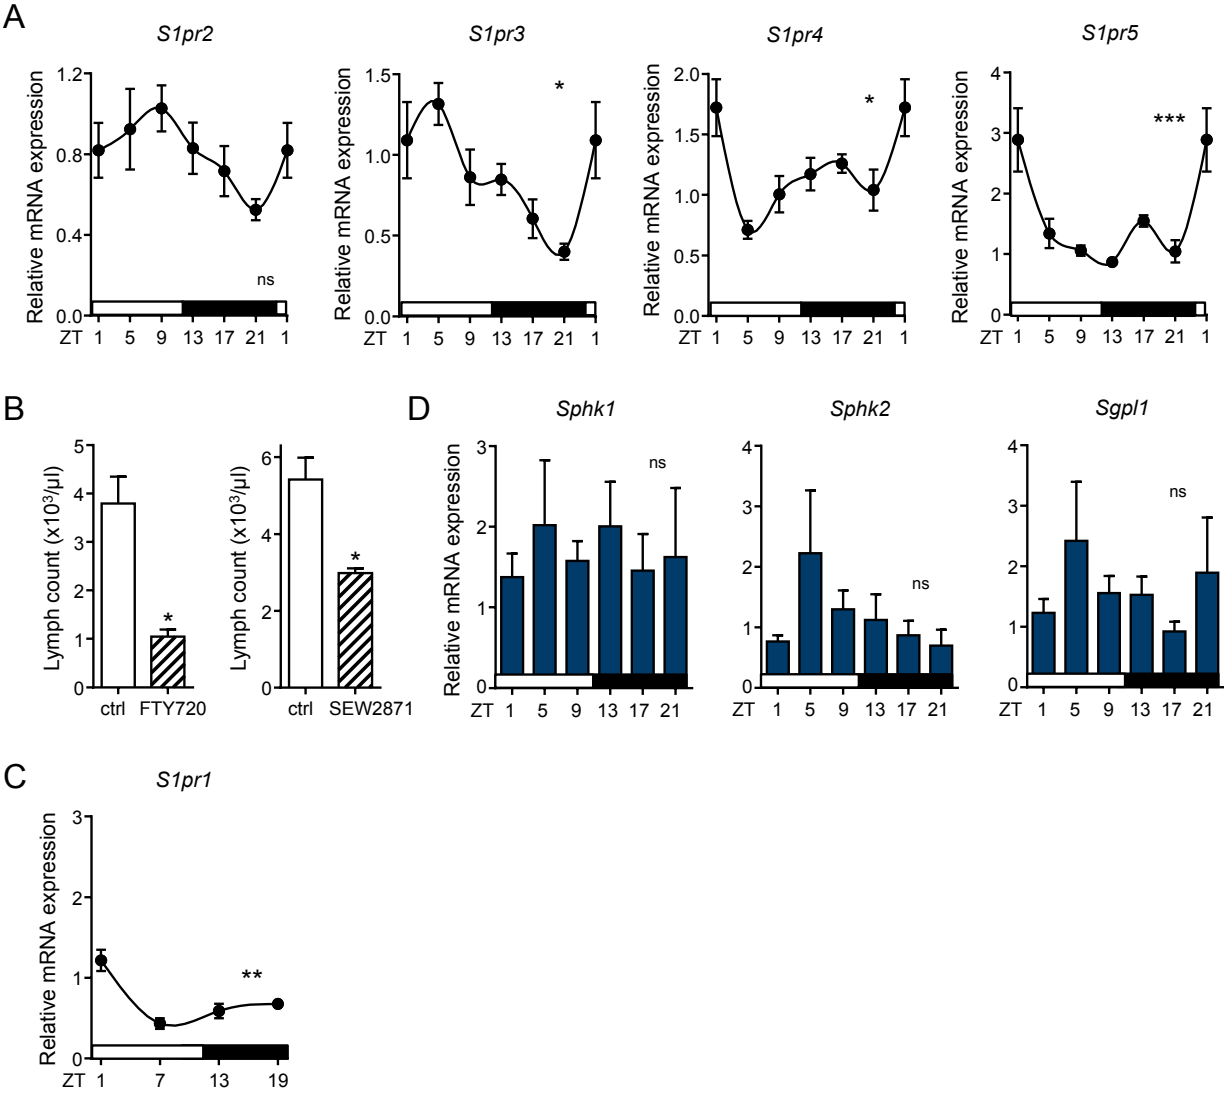

**Figure S5, related to Figure 5**

**Diurnal expression profiles of *S1pr* genes**

(A) Q-PCR analysis of LN *S1pr2*, *S1pr3*, *S1pr4* and *S1pr5* over 24h; n=3-5 mice, one-way ANOVA. (B) Lymph counts in control animals or animals treated with FTY720 or SEW2871; n=3-6 mice, unpaired student's t-test. (C) Q-PCR analysis of *S1pr1* in CD4 T cells isolated from *S1pr1*<sup>+/-</sup>*xCd4-cre* mice over 24h; n=3 mice, one-way ANOVA. (D) Q-PCR analysis of LN Sphingosine kinase 1 and 2 (*Sphk1* and *Sphk2*) and Sphingosine-1-phosphate lyase (*Sgpl1*) over 24h; n=3-5 mice, one-way ANOVA. \*p<0.05, \*\*p<0.01, \*\*\*p<0.001.

Figure S6

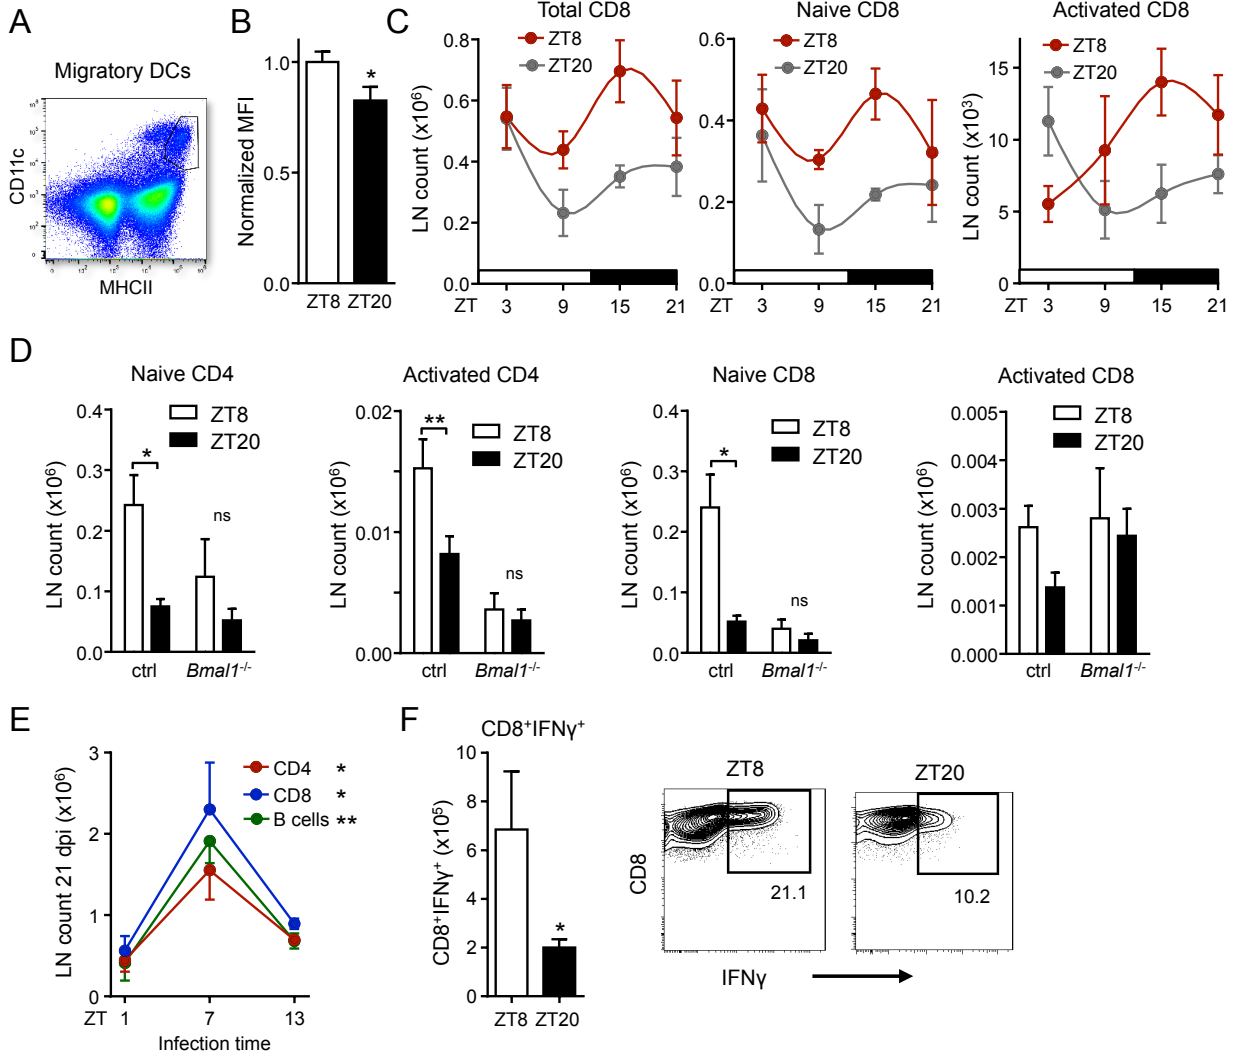

**Figure S6, related to Figure 6**

**Diurnal rhythmicity in experimental autoimmune encephalomyelitis (EAE)**

(A) Gating strategy (gated on live singlet cells) of migratory DCs. (B) Proliferation of MOG-specific T cells as analyzed by *in vivo* immunization of mice at ZT8 and ZT20, followed by dye-dilution analyses after re-stimulation with the antigen in culture; n=10 mice, unpaired student's t-test. (C) Diurnal profiles of inguinal lymph node counts of total CD8 T cells, naïve CD8 T cells, and activated CD8 T cells on day 2 after EAE induction; n=4 mice. Black and white bars indicate the dark and light periods, respectively (D) Naïve and activated CD4 and CD8 T cell counts in inguinal lymph nodes sampled at ZT15 on the second day after EAE induction; n=4-5 mice, unpaired student's t-test. (E) Lymph node counts of mice that were infected at different times of the day (ZT1, ZT7 or ZT13) with *Helicobacter pylori* and harvested at one time 21 days post infection (dpi); n=4 mice, one-way ANOVA. (F) Pulmonary CD8<sup>+</sup>IFN $\gamma$ <sup>+</sup> T cells of mice infected with influenza A virus at different times of the day (ZT8 and ZT20). Lungs were harvested 8 dpi and infiltrating T cells were enumerated and IFN $\gamma$  production was assessed by flow cytometry; n=4 mice, Mann-Whitney test. \*p<0.05, \*\*p<0.01.

| <b>Primers</b>                   | <b>Sequence</b>                                                        | <b>Annealing(°C)</b> |
|----------------------------------|------------------------------------------------------------------------|----------------------|
| <b>Bmal1_F</b><br><b>Bmal1_R</b> | AGA GGT GCC ACC AAC CCA TA<br>TGA GAA TTA GGT GTT TCA GTT CGT CAT      | 62                   |
| <b>Bmal1_F</b><br><b>Bmal1_R</b> | CCT AAT TCT CAG GGC AGC AGA T<br>TCC AGT CTT GGC ATC AAT GAG T         | 60                   |
| <b>Clock_F</b><br><b>Clock_R</b> | CAA AAT GTC ACG AGC ACT TAA TGC<br>ATA TCC ACT GCT GGC CTT TGG         | 62                   |
| <b>Per1_F</b><br><b>Per1_R</b>   | TGA GAG CAG CAA GAG TAC AAA CTC A<br>CTC GCA CTC AGG AGG CTG TAG       | 60                   |
| <b>Per2_F</b><br><b>Per2_R</b>   | GTC CAC CTC CCT GCA GAC AA<br>TCA TTA GCC TTC ACC TGC TTC AC           | 60                   |
| <b>Cry1_F</b><br><b>Cry1_R</b>   | CTC GGG TGA GGA GGT TTT CTT<br>GAC TTC CTC TAC CGA GAG CTT CAA         | 62                   |
| <b>Nr1d1_F</b><br><b>Nr1d1_R</b> | GAT AGC TCC CCT TCT TCT GCA TCA TC<br>TTC CAT GGC CAC TTG TAG ACT TC   | 60                   |
| <b>Nr1d1_F</b><br><b>Nr1d1_R</b> | AGC TCA ACT CCC TGG CAC TTA C<br>CTT CTC GGA ATG CAT GTT GTT C         | 60                   |
| <b>Dbp_F</b><br><b>Dbp_R</b>     | AAT GAC CTT TGA ACC TGA TCC CGC T<br>GCT CCA GTA CTT CTC ATC CTT CTG T | 60                   |
| <b>S1pr1_F</b><br><b>S1pr1_R</b> | CGG TGT AGA CCC AGA GTC CT<br>AGC AGC AGA TGA GAA TGA AC               | 64                   |
| <b>S1pr2_F</b><br><b>S1pr2_R</b> | ATG GGC GGC TTA TAC TCA GAG<br>GCG CAG CAC AAG ATG ATG AT              | 60                   |
| <b>S1pr3_F</b><br><b>S1pr3_R</b> | TTC CCG ACT GCT CTA CCA TC<br>CCA ACA GGC AAT GAA CAC AC               | 62                   |
| <b>S1pr4_F</b><br><b>S1pr4_R</b> | TGC GGG TGG CTG AGA GTG<br>TAG GAT CAG GGC GAA GAC C                   | 62                   |
| <b>S1pr5_F</b><br><b>S1pr5_R</b> | CTT AGG ACG CCT GGA AAC C<br>CCC GCA CCT GAC AGT AAA TC                | 62                   |
| <b>Ccr7_F</b><br><b>Ccr7_R</b>   | TCA TTG CCG TGG TGG TAG TCT TCA<br>ATG TTG AGC TGC TTG CTG GTT TCG     | 62                   |
| <b>Cxcr4_F</b><br><b>Cxcr4_R</b> | TCA GTG GCT GAC CTC CTC TT<br>CTT GGC CTT TGA CTG TTG GT               | 60                   |
| <b>Ccl21_F</b><br><b>Ccl21_R</b> | ACA GCG GCC TCC AGA AGA ACA GCG G<br>CGT GAA CCA CCC AGC TTG A         | 64                   |
| <b>Gapdh_F</b><br><b>Gapdh_R</b> | TGT GTC CGT CGT GGA TCT GA<br>CCT GCT TCA CCA CCT TCT TGA              | 60                   |
| <b>Eef1a_F</b><br><b>Eef1a_R</b> | TGC CCC AGG ACA CAG AGA CTT CA<br>AAT TCA CCA ACA CCA GCA GCA A        | 60                   |
| <b>Sphk1_F</b><br><b>Sphk1_R</b> | GAAGACCTGCTCATCAACTGC<br>GTGCCCACTGTGAAACGAA                           | 60                   |
| <b>Sphk2_F</b><br><b>Sphk2_F</b> | TAGATGGGGAGTTAGTGGAGTATG<br>TGCTTTTAGGCTCGTTCAGG                       | 60                   |
| <b>Sgpl1_F</b><br><b>Sgpl1_R</b> | TGATGGCCTGCAAAGCTT<br>GCCACAATTTCTGGAGTTTTGA                           | 60                   |
| <b>Il2_F</b><br><b>Il2_R</b>     | AACCTGAAACTCCCCAGGAT<br>CGCAGAGGTCCAAGTTCATC                           | 60                   |

**Q-PCR primer sequences, related to Figure 2, 3, 5, 6, S2, S5**

## **Movie S1**

Movie showing the circadian migration of lymphocytes through lymph nodes. At night onset, increased homing due to higher amounts of lymphocyte CCR7 leads to enhanced lymphocyte counts in the lymph node. During the day, higher *S1pr1* expression induces the egression of lymphocytes into efferent lymph.

## **SUPPLEMENTAL EXPERIMENTAL PROCEDURES**

### **Antibodies**

Antibodies targeting the following antigens were used: CD3e (clone 145-2C11; Biolegend), CD3 (17A2; Biolegend), CD4 (GK1.5; Biolegend), CD8a (53-6.7; Biolegend), CD16/32 (2.4G2; BD Biosciences), CD44 (IM7; Biolegend), CD45 (30-F11; Biolegend), CD62L (MEL-14; Biolegend), B220 (RA3-6B2; Biolegend), NK1.1 (PK136; Biolegend), Gr-1 (RB6-8C5, Biolegend), CD11b (M1/70; Biolegend), CD11c (N418; Biolegend), MHCII I-A/I-E (M5/114.15.2, Biolegend); CCR7 (4B12; Biolegend), CXCR4 (L276F12; Biolegend), CD11a (M17/4; Biolegend), IL-17A (TC11-18H10, BD Horizon), CD49d (R1-2, Biolegend), Ki67 (SolA15; eBioscience), PECAM-1 (Mec13.3; Biolegend), Lyve-1 (ALY7; eBioscience), CCL21 (goat anti-mouse polyclonal; R&D Systems), ICAM-1 (YN1/1.7.4; Biolegend), PNA<sup>d</sup> (MECA-79, Biolegend), blocking antibodies against CD49d (PS/2) and CD11a (M17/4; both BioXCell), BMAL1 (NB 100-2288; Novus Biologicals), beta-tubulin (ab6046; Abcam).

### **Mass spectrometry analyses**

Proteins of 20  $\mu$ L sample matrix were precipitated by adding 200  $\mu$ L methanol including D-erythro-sphingosine-1-phosphate C17 base (860641P, Avanti Polar Lipids) as internal standard. After centrifugation the supernatant was used for the analysis of S1P by liquid chromatography mass spectrometry (LC-MS/MS) analyses with a 1200 SL HPLC system (Agilent) coupled to a 4000QTRAP tandem mass spectrometer (AB Sciex). Separation was achieved with a Zorbax SB-C18, particle size 3.5  $\mu$ m, 150 mm  $\times$  2.1 mm HPLC column (Agilent) and water with 0.1% formic acid as mobile phase A and methanol/ isopropanol (1:1) with 0.1% formic acid as mobile phase B. A gradient elution was used for optimal separation from 60% B to 80% B within 7 minutes. After column cleaning at 100% B for 1 minute, the gradient was equilibrated for 2.5 min at 60% B before the next injection. The LC-MS/MS system operated in positive electrospray ionization with electron voltage of 5500V at 400  $^{\circ}$ C. Auxiliary gas was set to 50 psi and 60 psi was used for nebulizer gas. Curtain gas was set to 30 psi and collision gas was set to 8 psi. Mass transitions and individual energies (declustering potential, collision energy, collision cell exit potential) were optimized by direct infusion and set as follows: m/z 380.2 $\rightarrow$ 264.2 (66, 23, 18) and 380.2 $\rightarrow$ 82.1 (66, 49, 6) for S1P and 366.2 $\rightarrow$ 250.2 (61, 23, 18) and 366.2 $\rightarrow$ 82.0 (61, 45, 6) for internal standard. Mass transitions were detected in multiple reaction monitoring mode with a dwell time of 100 ms. Quantification was achieved by standard calibrating curves prepared from D-erythro-sphingosine-1-phosphate C18:1 base (860492P, Avanti Polar Lipids) at different concentration points in the range from 0.005 to 0.5  $\mu$ mol/L.

### **Western blotting**

To obtain total cell lysates, MACS-purified T cells were incubated with RIPA buffer (150 mM NaCl; 50 mM Tris-HCl, 0.1 % SDS, 0.5 % Na-Dox, 0.1 % SDS, 1 % NP40, 1 mM EDTA, and proteinase inhibitor). Nuclei were pelleted in a microfuge at 14,000 x g for 15 min, and the supernatant was used as the cytoplasm fraction. Cell lysates were normalized by measuring total protein concentrations using the Pierce BCA Protein Assay Kit (Thermo Scientific) according to the manufacturer's protocol. Proteins were separated on a 10 % SDS-PAGE and transferred to PVDF membranes (Roche). Membranes were blocked in 5 % milk powder for 1 h and then probed with anti-BMAL1 antibody (1:2000 in 5 % milk-TBS; NB 100-2288, Novus Biologicals, Littleton, USA) overnight at 4 °C. Anti- $\beta$ -Tubulin antibody (Abcam) was used for normalisation. HRP-conjugated anti-rabbit or anti-mouse IgGs were used as secondary antibodies. Proteins were visualized by enhanced chemiluminescence (Thermo, No. 34080) and a Fusion SL Image Acquisition System (Vilber Lourmat).

### **Histology**

Mice were perfused intracardially with ice-cold PBS followed by fixation with 4% paraformaldehyde (PFA) for 10 minutes. Spinal cords were post-fixed overnight and then dissected from the spinal canal. Paraffin embedded 10- $\mu$ m transverse sections of the lumbar spinal cord were stained for total myelin with Luxol Fast Blue Stain/ Cresyl Echt Violet (Abcam) according to the manufacturer's instructions, dehydrated, cleared with xylene, and mounted for microscopy. Images of lumbar spinal cord were taken at levels L1/2, L3/4 and L5/6 for each mouse and demyelinated areas measured using ImageJ software (National Institutes of Health).

### **Quantitative real-time PCR**

RNA was extracted using RNeasy Plus Mini Kit (Qiagen) or with TRIzol reagent (Life Technologies), in accordance with the manufacturers' instructions. Reverse transcription was carried out using the High Capacity cDNA Reverse Transcription Kit (Applied Biosystems), in accordance with the manufacturer's instructions. Q-PCR was performed with SYBR GREEN on a StepOnePlus Real-Time PCR System (Applied Biosystems). A primer concentration of 0.5 $\mu$ M was found to be optimal in all cases. The sequences of the oligonucleotides used are included in the Supplemental Experimental Procedures. The PCR protocol consisted of one cycle at 95 °C (10 min) followed by 40 cycles of 95 °C (15 s) and 60-64 °C (1 min). Expression of glyceraldehyde-3-phosphate dehydrogenase (GAPDH) was generally used as a standard. For EAE experiments Q-PCR was conducted with the GoTaq Q-PCR Master Mix (Promega) and a CFX96 Real-Time PCR Detection System (Bio-Rad) according to the manufacturer's instructions, along with gene-specific primers. Eef1a was used as reference gene. Relative quantification was performed using the  $\Delta\Delta$ CT method.

### **T-cell proliferation analyses**

Spleens were harvested from mice 10 days after EAE immunization. CD3+ T cells were negatively selected using the Pan T Cell Isolation Kit II (Miltenyi Biotec) and labelled with a proliferation dye (CellTrace™ Violet Cell Proliferation Kit, Life Technologies). T-cell depleted splenocytes ( $1 \times 10^5$ /well) isolated from EAE mice were



cultured in the presence or absence of the MOG peptide (10 µg/ml) or irrelevant peptide (ovalbumin) (10 µg/ml) or no antigen at 37°C in 5% CO<sub>2</sub> for 1 h. CD3<sup>+</sup> T cells were co-cultured with antigen-pulsed splenocytes at 37°C in 5% CO<sub>2</sub> for 3 days RPMI medium 1640 supplemented with 10% FCS, 10mM HEPES and 55µM beta-mercaptoethanol in 96-well flat-bottom plates, at 2×10<sup>5</sup> cells per well.

### **Helicobacter pylori infection**

Mice were infected orogastrically at ZT1, ZT7 and ZT13 with the H. pylori strain PMSS1wt with a dose of 10<sup>9</sup> bacteria. Animals were sacrificed after 3 weeks and LN cellularity was analyzed by flow cytometry.

### **Influenza A virus infection**

Female 8-10 week old C57B/6 (CD45.1<sup>+</sup>) mice were intranasally infected with 100 plaque forming units (pfu) of Influenza A virus (strain A/Puerto Rico/8/1934 H1N1) at ZT8 and ZT20. Animals were sacrificed on day 8 post infection and lymphocyte infiltration and activation was assessed in lung tissue homogenates by flow cytometry. Animal experiments were approved by the local animal ethics committee (LAGeSo).
